# Supplementary material for: Tissue Type-Specific Expression of the dsRNA-Binding Protein 76 and Genome-Wide Elucidation of Its Target mRNAs
Source: PLoS One. 2010 Jul 23;5(7):e11710. doi: 10.1371/journal.pone.0011710 (PMC2909144; doi:10.1371/journal.pone.0011710)
Supplement: Figure S1 — List of putative DRBP76 target mRNAs in HEK293 cells. (0.16 MB XLS) [file pone.0011710.s001.xls]

## Sheet: DRBP76 Targets
Name	Gene Symbol	Description	T-score DRBP76vsMock	Log FC (DRBP76vsMock)	Average PR DRBP76	Average PR Mock	Avg PR Totals	Target	DRBP76_1	DRBP76_2	DRBP76_3	DRBP76_4	DRBP76_5	Mock_1	Mock_2	Mock_3	Mock_4	Mock_5	Total_1	Total_2	Total_3	Total_4	Total_5
H300010270	NULL	15 kDa protein [Source:IPI;Acc:IPI00157456]	10.5734	2.68563	0.993523	0.436223	0.0688629	1	2.44428	2.92489	2.7022	3.35093	2.13406	-0.13368	0.100225	0.262314	-0.138759	0.0380934	-0.58156	-1.132	-0.644809	-0.853474	-0.658876
H300002648	RPS17	40S ribosomal protein S17. [Source:Uniprot/SWISSPROT;Acc:P08708]	10.0483	7.57218	0.999544	0.665593	0.545234	1	9.8011	7.25996	7.50169	9.38331	5.96109	0.918862	0.0199753	1.04915	-0.137282	0.195535	0.133986	0.00271249	0.261123	-0.0289544	-0.0211563
H200015818	RS14_HUMAN	40S ribosomal protein S14 (PRO2640). [Source:Uniprot/SWISSPROT;Acc:P62263]	9.06514	5.42315	0.998577	0.626115	0.573853	1	5.38169	5.30112	6.05926	7.42941	3.79355	0.2081	0.178016	0.495199	0.0929353	-0.12498	0.105527	-0.0544166	0.103023	0.0129391	0.274079
H300021292	Q13666_HUMAN	40S ribosomal protein S21. [Source:Uniprot/SWISSPROT;Acc:P63220]	8.93082	3.16512	0.99541	0.627971	0.252375	1	4.47239	3.11313	2.72885	3.71262	2.60092	0.357192	0.101221	0.331287	-0.0237061	0.0363264	-0.270555	-0.25478	-0.0330121	-0.395562	-0.17604
opHsV0400007273	RPL10	60S ribosomal protein L10 (QM protein) (Tumor suppressor QM) (Laminin receptor homolog). [Source:Uniprot/SWISSPROT;Acc:P27635]	8.85933	2.62135	0.994515	0.641516	0.184823	1	2.991	2.24191	3.15899	3.5377	2.14209	0.339921	0.171302	0.563935	-0.142727	0.0324907	-0.388371	-0.490087	-0.181562	-0.245464	-0.342314
H300003663	RPS10	40S ribosomal protein S10. [Source:Uniprot/SWISSPROT;Acc:P46783]	8.65101	5.49392	0.998849	0.887318	0.691812	1	6.22793	5.36495	5.49496	8.21121	4.52142	0.552201	0.24845	0.865397	0.197818	0.486977	0.124896	0.222341	-0.0115561	0.337579	0.50508
H300000067	XP_208072.3	PREDICTED: similar to ribosomal protein L13a; 60S ribosomal protein L13a; 23 kD highly basic protein [Source:RefSeq_peptide;Acc:XP_208072]	8.47605	4.01591	0.997585	0.865808	0.367759	1	4.53766	3.51158	4.64217	5.91038	3.29039	0.184874	0.393685	0.55959	0.195887	0.478573	0.0142366	-0.231524	-0.190628	-0.0554508	-0.00200422
opHsV0400000824	Q8N6E1_HUMAN	60S ribosomal protein L15. [Source:Uniprot/SWISSPROT;Acc:P61313]	8.33668	4.84659	0.998369	0.783512	0.283208	1	6.61188	3.73336	5.24935	6.08985	3.8583	0.321008	0.178086	0.453741	0.203358	0.153621	-0.0589811	-0.380728	-0.137876	-0.182788	-0.124358
opHsV0400002262	NULL	15 kDa protein [Source:IPI;Acc:IPI00414852]	8.02456	2.222	0.991812	0.488773	0.851575	1	2.15912	1.59941	2.26775	3.25897	2.11618	-0.107418	0.0290629	0.253947	0.100838	0.0149876	0.421062	0.550075	0.605541	0.45699	0.577721
H300007523	Q5T6D9_HUMAN	OTTHUMP00000039257 (OTTHUMP00000016039). [Source:Uniprot/SPTREMBL;Acc:Q5T6D9]	7.97449	3.63696	0.996913	0.691108	0.443339	1	4.96011	2.72913	4.11008	4.55374	2.88681	0.455078	-0.129692	0.252502	0.208082	0.269112	-0.00270036	-0.0982131	-0.00819082	-0.00249037	0.000567217
H300001146	RPS12	40S ribosomal protein S12. [Source:Uniprot/SWISSPROT;Acc:P25398]	7.90997	1.73688	0.989205	0.618295	0.0629618	1	1.92272	1.95815	1.88311	2.49086	1.16832	0.0347968	0.0236103	0.333045	0.093058	0.25427	-0.65838	-1.13109	-0.745747	-0.892063	-0.61186
H300002091	RS4X_HUMAN	40S ribosomal protein S4, X isoform (Single copy abundant mRNA protein) (SCR10). [Source:Uniprot/SWISSPROT;Acc:P62701]	7.85306	3.05435	0.995986	0.868895	0.729378	1	2.93874	2.4332	4.12977	4.46751	3.05028	0.319819	0.325324	0.591299	0.310731	0.2006	0.624077	0.306148	-0.0230235	0.360861	0.291267
opHsV0400004416	Q8N6E1_HUMAN	60S ribosomal protein L15. [Source:Uniprot/SWISSPROT;Acc:P61313]	7.78991	3.64912	0.996626	0.406541	0.543755	1	3.95396	2.17058	4.59545	4.51481	2.98318	0.0417341	0.0348256	0.0271829	-0.133916	0.00257273	0.179831	0.818737	0.119924	-0.177981	-0.234101
opHsV0400007041	NULL	Human 18S ribosomal RNA	7.70757	9.46571	0.99976	0.89669	0.0315209	1	13.9463	11.4099	8.48704	12.2076	8.80597	3.5448	0.234876	2.51304	0.188252	1.04721	-1.29363	-1.27463	-1.57171	-0.643871	-1.53966
opHsV0400002346	XP_371273.1	PREDICTED: similar to 40S ribosomal protein SA (p40) (34/67 kDa laminin receptor) (Colon carcinoma laminin-binding protein) (NEM/1CHD4) (Multidrug resistance-associated protein MGr1-Ag) [Source:RefSeq_peptide;Acc:XP_371273]	7.70682	3.11459	0.99549	0.371166	0.634064	1	3.12424	2.29493	3.4079	4.41136	2.22691	-0.109832	-0.129666	-0.030172	0.0989355	0.0631314	0.101195	0.0574357	0.158286	0.0907041	0.248263
opHsV0400007040	NULL	Human 18S ribosomal RNA	7.62093	7.37467	0.99952	0.819063	0.0286263	1	11.0964	7.47749	6.42093	9.3061	6.60639	1.94689	0.167459	1.47987	0.0780016	0.361731	-1.14706	-1.56493	-1.53201	-0.766381	-1.31504
H300021161	NULL	29 kDa protein [Source:IPI;Acc:IPI00413108]	7.49287	5.68303	0.998673	0.572797	0.39525	1	4.79993	4.88299	5.98018	8.66588	4.64958	0.0822485	0.175003	-0.017002	-0.0236072	0.346774	-0.10947	-0.228354	-0.0334462	-0.030026	0.0601856
opHsV0400007047	NULL	-	7.47241	2.97945	0.994866	0.424884	0.834767	1	2.86451	2.41403	3.34312	4.25693	2.00529	0.0915242	-0.125228	0.208095	-0.249792	0.0620567	0.377346	0.846208	0.492537	0.423238	0.357711
H300004931	RPL9	60S ribosomal protein L9. [Source:Uniprot/SWISSPROT;Acc:P32969]	7.2888	4.79314	0.998049	0.638957	0.101375	1	7.34105	4.45789	4.72188	4.95315	3.3763	0.317126	-0.0535098	0.389884	-0.0211885	0.252234	-0.612603	-0.950538	-0.379594	-0.475497	-0.562945
H300009449	XP_372048.1	PREDICTED: similar to 40S ribosomal protein SA (p40) (34/67 kDa laminin receptor) (Colon carcinoma laminin-binding protein) (NEM/1CHD4) (Multidrug resistance-associated protein MGr1-Ag) [Source:RefSeq_peptide;Acc:XP_372048]	7.07942	4.55896	0.997729	0.531281	0.578986	1	4.20276	3.90294	4.6637	7.08344	3.43583	0.106322	-0.0527342	0.403205	0.0948091	-0.057703	0.0969169	-0.031962	0.137165	0.0267735	0.202698
opHsV0400007039	NULL	Human 18S ribosomal RNA	6.9156	9.43164	0.999744	0.891076	0.0102991	1	12.852	12.6854	7.25211	13.031	9.06594	2.99737	0.453816	3.31408	0.0763577	0.886604	-1.59209	-2.26637	-2.15619	-1.17646	-2.16171
H200001032	RL40_HUMAN	Ubiquitin. [Source:Uniprot/SWISSPROT;Acc:P62988]	6.90484	2.95734	0.994427	0.476899	0.737766	1	2.22675	2.72744	3.84325	4.1482	2.03623	0.0194387	0.0594638	0.19633	-0.0270662	-0.0530132	0.202127	0.226257	0.322315	0.258157	0.295004
opHsV0400000896	RPL10	60S ribosomal protein L10 (QM protein) (Tumor suppressor QM) (Laminin receptor homolog). [Source:Uniprot/SWISSPROT;Acc:P27635]	6.85571	2.00779	0.990133	0.266768	0.131857	1	2.10315	1.3288	2.33658	2.6491	1.16513	-0.270529	-0.136313	0.0433046	-0.0227297	-0.0699148	-0.48698	-0.768266	-0.275863	-0.388879	-0.467292
H300002118	XP_370681.1	PREDICTED: similar to ribosomal protein L13a; 60S ribosomal protein L13a; 23 kD highly basic protein [Source:RefSeq_peptide;Acc:XP_370681]	6.8419	2.42251	0.992707	0.426883	0.469727	1	2.52151	1.96507	3.01836	3.31273	1.36841	0.0532991	-0.132826	0.01141	0.0945319	0.0471254	-0.0520817	0.0153582	-0.0208588	-0.03445	0.0864028
opHsV0400007667	NULL	-	6.45749	2.88511	0.993667	0.220694	0.723013	1	2.40432	2.1125	2.83554	4.37078	1.89054	-0.0365859	-0.292342	-0.076359	-0.367262	-0.0393117	0.0821221	0.348274	0.31695	0.243624	0.260714
H300005737	RPL18	60S ribosomal protein L18. [Source:Uniprot/SWISSPROT;Acc:Q07020]	6.43193	3.19877	0.995634	0.509723	0.856261	1	2.78683	2.52147	4.05077	4.77292	2.23281	0.0706865	-0.0502184	0.367803	0.207456	-0.224773	0.468164	0.548721	0.489953	0.496853	0.675787
opHsV0400008251	NULL	-	6.39361	1.29173	0.983448	0.374796	0.832496	1	1.17201	1.0131	1.80909	1.54715	0.707186	0.0269816	-0.196033	-0.136304	-0.00333366	0.0985751	0.32567	0.65557	0.84193	0.290842	0.417937
H300000309	XP_370727.1	PREDICTED: similar to ribosomal protein L13a; 60S ribosomal protein L13a; 23 kD highly basic protein [Source:RefSeq_peptide;Acc:XP_370727]	6.34137	1.79184	0.988901	0.365537	0.589253	1	1.67349	1.46862	2.32522	2.44201	0.952491	-0.104153	-0.128852	0.14694	0.0976544	-0.108958	0.00349557	0.176029	0.0602926	0.0658965	0.131842
opHsV0400005807	XP_370697.1	PREDICTED: similar to 40S ribosomal protein SA (p40) (34/67 kDa laminin receptor) (Colon carcinoma laminin-binding protein) (NEM/1CHD4) (Multidrug resistance-associated protein MGr1-Ag) [Source:RefSeq_peptide;Acc:XP_370697]	6.32941	3.85249	0.996434	0.21708	0.587222	1	3.25977	2.77821	3.72836	6.06943	2.8478	-0.17455	-0.13081	-0.0351772	-0.0161042	-0.222255	0.0442496	0.0322644	0.180712	0.0426765	0.143314
opHsV0400003120	NULL	-	6.31	1.67339	0.988358	0.471326	0.35319	1	1.93735	1.08153	1.92445	2.44749	1.16307	-0.166286	0.0275583	0.0682055	0.205205	0.0522475	0.0711516	0.0631902	-0.195442	-0.243004	-0.377635
H200000517	RL38_HUMAN	60S ribosomal protein L38. [Source:Uniprot/SWISSPROT;Acc:P63173]	6.22853	1.73717	0.991572	0.901855	0.708796	1	2.38732	1.848	2.37039	2.94938	1.43101	0.315503	0.177099	0.789952	0.520759	0.496953	0.0455363	0.299193	0.144182	0.313387	0.410009
opHsV0400013390	NULL	Human 28S ribosomal RNA	6.05318	5.90498	0.998737	0.66584	0.00524548	1	9.03689	5.52	5.02217	7.48063	3.51489	0.407254	-0.151638	0.563193	0.182838	0.0480268	-1.84753	-2.58715	-2.94411	-1.62912	-2.63934
H300006571	XP_373027.2	PREDICTED: similar to ribosomal protein S15a [Source:RefSeq_peptide;Acc:XP_373027]	6.0407	3.37194	0.996818	0.901215	0.522757	1	5.19748	3.38386	3.88612	4.67373	2.10116	0.376047	0.324017	1.08101	0.306274	0.295315	0.0300371	0.713058	0.25502	-0.23443	-0.205016
H300007722	NULL	10 kDa protein [Source:IPI;Acc:IPI00334885]	5.99867	1.06394	0.979866	0.369167	0.794403	1	1.10424	0.813243	1.55559	0.930394	0.727592	0.0224712	-0.195489	-0.154048	0.328245	-0.189808	0.272208	1.25312	0.298081	0.293611	0.251289
H200002676	NGFRAP1	p75NTR-associated cell death executor (Nerve growth factor receptor associated protein 1) (Ovarian granulosa cell 13.0 kDa protein HGR74). [Source:Uniprot/SWISSPROT;Acc:Q00994]	5.95711	1.28078	0.985895	0.635495	0.346842	1	1.66863	0.882828	1.9645	1.50109	1.10407	0.241414	-0.0332871	0.273668	-0.119166	0.354611	0.0976141	-0.0484205	-0.191053	-0.326997	-0.134254
opHsV0400005786	XP_496429.1	PREDICTED: similar to 60S ribosomal protein L10 (QM protein homolog) [Source:RefSeq_peptide;Acc:XP_496429]	5.92156	1.06232	0.977003	0.2996	0.201535	1	1.17067	0.532808	1.26997	1.2674	0.634648	0.0663483	-0.212611	0.132136	-0.252529	-0.169453	-0.378538	-0.265275	-0.107539	-0.320951	-0.421009
H200007627	RS13_HUMAN	40S ribosomal protein S13. [Source:Uniprot/SWISSPROT;Acc:P62277]	5.90469	2.10697	0.992452	0.807548	0.281945	1	2.08717	2.26394	3.00656	3.40133	1.48866	0.371644	0.252074	0.74478	0.0933214	0.250991	-0.152493	-0.202832	-0.0774128	-0.327585	-0.097479
H300020621	EF1A1_HUMAN	Elongation factor 1-alpha 1 (EF-1-alpha-1) (Elongation factor 1 A-1) (eEF1A-1) (Elongation factor Tu) (EF-Tu). [Source:Uniprot/SWISSPROT;Acc:P68104]	5.87845	2.21981	0.992851	0.826355	0.0235087	1	3.8998	1.82316	2.63745	2.20044	1.96162	0.261524	0.314747	0.433027	0.191541	0.222593	-1.01006	-1.79751	-1.58396	-1.02961	-1.45494
H300010002	RPL9	60S ribosomal protein L9. [Source:Uniprot/SWISSPROT;Acc:P32969]	5.8604	4.56808	0.997793	0.643083	0.0902767	1	7.56171	3.47344	4.37486	5.16202	3.32553	0.104259	0.0260228	0.678821	0.0947286	0.153347	-0.583789	-1.09331	-0.434819	-0.56887	-0.597783
opHsV0400003898	RPS2	40S ribosomal protein S2 (S4) (LLRep3 protein). [Source:Uniprot/SWISSPROT;Acc:P15880]	5.8597	2.42143	0.993155	0.539949	0.42482	1	2.35841	1.54925	3.15006	3.72574	1.81714	0.0255621	0.022804	0.374379	-0.0231661	0.0938778	-0.00396829	-0.105689	0.0123151	-0.197256	0.0711348
H300008269	NULL	-	5.85458	3.1259	0.99605	0.764577	0.432177	1	3.00388	2.27252	3.91381	5.24432	2.86583	0.59539	0.247497	0.66908	-0.0274948	0.186392	-0.00952749	-0.059182	-0.0131948	-0.197861	0.0970622
H300008824	MT1L	Metallothionein-IL (MT-1L) (MT1X). [Source:Uniprot/SWISSPROT;Acc:P80297]	5.7989	1.05318	0.973629	0.165457	0.436079	1	0.510444	0.689479	1.42632	1.19885	0.604684	-0.149494	-0.200679	-0.121757	-0.12237	-0.24184	-0.20694	0.0703732	0.304149	-0.169566	-0.103333
H300022178	RS27A_HUMAN	Ubiquitin. [Source:Uniprot/SWISSPROT;Acc:P62988]	5.79034	3.04716	0.994611	0.67422	0.0338238	1	4.9651	3.1442	2.15752	3.74418	2.29668	-0.0420104	0.0194653	0.562654	0.195964	0.335804	-1.0394	-1.75376	-0.894363	-1.09866	-0.927372
opHsV0400008958	NULL	-	5.78553	2.39387	0.992628	0.446106	0.6083	1	2.12576	1.67757	2.85372	3.80778	1.67082	0.212208	-0.0538587	0.213045	-0.137435	-0.06767	0.194498	0.570732	0.226235	-0.212764	0.041961
H300007940	RS8_HUMAN	40S ribosomal protein S8. [Source:Uniprot/SWISSPROT;Acc:P62241]	5.67452	1.73606	0.989765	0.627347	0.0830641	1	2.78647	1.69645	1.81011	2.3152	1.21578	0.463832	-0.0561797	0.672304	-0.0245988	0.0883379	-0.484025	-1.01057	-0.661551	-0.679954	-0.563781
H300018734	OAZ1	Ornithine decarboxylase antizyme (ODC-Az). [Source:Uniprot/SWISSPROT;Acc:P54368]	5.67102	4.83837	0.998081	0.699552	0.829938	1	3.91268	3.78498	6.0054	8.01397	3.73325	0.647311	0.0301141	0.31632	0.0975486	0.167125	0.507796	0.331551	0.373174	0.432723	0.722536
H300005362	XP_208300.2	PREDICTED: similar to 60S ribosomal protein L23a [Source:RefSeq_peptide;Acc:XP_208300]	5.62341	1.5996	0.984695	0.310619	0.586295	1	2.51534	1.3617	1.01149	1.79072	1.04455	-0.126731	-0.133537	0.12158	-0.0185356	-0.116969	0.171366	-0.180716	0.185972	0.0907889	0.202369
opHsV0400003131	NULL	-	5.40827	2.08189	0.990261	0.273725	0.160067	1	3.24199	1.34784	2.2458	1.91869	1.10045	-0.331536	-0.206319	0.120336	-0.135639	-0.00154351	-0.445221	-0.565735	-0.113676	-0.373236	-0.606241
opHsV0400003528	XP_039702.1	PREDICTED: similar to ribosomal protein S3a; 40S ribosomal protein S3a; v-fos transformation effector protein 1 [Source:RefSeq_peptide;Acc:XP_039702]	5.36068	1.62788	0.981545	0.0569327	0.230993	1	2.31798	0.966338	1.67048	0.645506	0.993864	-0.145848	-0.294619	-0.337132	-0.370925	-0.396703	-0.554862	-0.00173801	-0.104285	-0.339648	-0.601855
H200011624	C14ORF2	6.8 kDa mitochondrial proteolipid (PRO1574). [Source:Uniprot/SWISSPROT;Acc:P56378]	5.346	1.01812	0.960467	0.225076	0.958404	1	1.24148	0.817517	1.3086	0.742216	0.337523	-0.323989	-0.126252	-0.110022	0.100982	-0.183986	0.86465	1.32134	1.32365	0.735601	1.05548
opHsV0400008732	TMEM14B	Transmembrane protein 14B. [Source:Uniprot/SWISSPROT;Acc:Q9NUH8]	5.33967	1.00938	0.963298	0.194635	0.261267	1	0.979945	0.381431	1.25448	0.777969	0.542561	-0.354713	-0.28214	-0.426193	-0.239449	0.191969	-0.121245	-0.175266	-0.0554011	-0.344742	-0.35175
H300000022	Q5W1B9_HUMAN	OTTHUMP00000028841. [Source:Uniprot/SPTREMBL;Acc:Q5W1B9]	5.28039	2.0837	0.992771	0.812138	0.327891	1	2.92909	1.52558	3.39454	2.57841	1.40826	0.248317	0.405134	0.433547	0.210844	0.11954	-0.1278	-0.323043	-0.198618	0.00679537	-0.0320324
H200008620	RS11_HUMAN	40S ribosomal protein S11. [Source:Uniprot/SWISSPROT;Acc:P62280]	5.2745	2.58668	0.994003	0.660275	0.615593	1	3.09439	2.13688	3.47933	3.87124	1.17386	0.0414297	0.253737	0.282582	0.0934792	0.151055	0.214456	0.0417255	0.0386848	0.0795879	0.211913
opHsV0400005804	NP_005508.1	high-mobility group nucleosomal binding domain 2 [Source:RefSeq_peptide;Acc:NP_005508]	5.26822	1.82537	0.988549	0.38655	0.782744	1	1.08263	1.21417	2.49951	2.68637	1.52735	0.263334	0.109445	-0.265264	-0.0125367	-0.211808	0.507116	0.521463	0.182315	0.390988	0.237363
opHsV0400007390	NULL	-	5.26343	1.6161	0.983896	0.155397	0.574956	1	1.2869	0.60277	1.63343	2.25231	0.970115	-0.484485	-0.381968	0.193331	-0.374426	-0.287436	0.112748	0.375681	0.167725	-0.0889296	-0.0242447
H300006915	RS18_HUMAN	40S ribosomal protein S18 (Ke-3) (Ke3). [Source:Uniprot/SWISSPROT;Acc:P62269]	5.2621	1.3715	0.986598	0.690916	0.181625	1	2.24622	1.17204	1.302	2.10606	1.1329	0.234032	0.0966566	0.562709	-0.0289793	0.23727	-0.166983	-0.618971	-0.385042	-0.269763	-0.297331
H300006848	NP_689563.1	-	5.22177	1.09581	0.970302	0.359172	0.132512	1	1.27047	0.813684	1.2298	1.47393	0.402902	0.0997476	-0.204934	-0.315028	0.10443	0.0275434	-0.389621	-0.720881	-0.203619	-0.605003	-0.553798
H200004769	H4_HUMAN	Histone H4. [Source:Uniprot/SWISSPROT;Acc:P62805]	5.19069	5.60128	0.998897	0.868479	0.884599	1	8.96511	4.06188	6.71792	8.02908	3.67714	1.34386	0.742769	1.04689	0.205708	0.105502	0.520314	0.613477	0.271981	1.10839	1.16893
opHsV0400004767	XP_377716.2	PREDICTED: similar to 40S ribosomal protein S17 [Source:RefSeq_peptide;Acc:XP_377716]	5.1651	3.75621	0.996514	0.362082	0.919463	1	3.85025	1.49775	5.64246	4.6771	2.94637	-0.202673	-0.375637	0.452093	0.101452	-0.142342	1.32044	1.6669	1.66723	0.343713	0.46671
H300001820	NULL	31 kDa protein [Source:IPI;Acc:IPI00477975]	5.09084	3.17011	0.994467	0.313258	0.71337	1	2.23044	2.2477	3.76063	5.21612	1.98593	-0.27348	0.0312937	-0.0315085	-0.248992	0.112938	0.150158	0.543625	0.142103	0.114478	0.308088
H300004068	RL41_HUMAN	60S ribosomal protein L41 (HG12). [Source:Uniprot/SWISSPROT;Acc:P62945]	5.0326	4.63753	0.998585	0.937638	0.566552	1	8.50198	5.44655	4.72127	6.80392	4.12834	2.11841	0.695193	2.72343	0.193585	0.683825	0.0570039	-0.200438	0.0831506	0.21483	0.204796
H300006914	RPL36	60S ribosomal protein L36. [Source:Uniprot/SWISSPROT;Acc:Q9Y3U8]	5.00026	1.61489	0.989909	0.739613	0.901167	1	1.79941	1.17319	2.62293	2.55679	1.28748	0.28531	0.105656	0.667578	0.0950448	0.211759	0.788532	0.584582	0.565389	0.727757	0.820765
H300007144	RS15_HUMAN	40S ribosomal protein S15 (RIG protein). [Source:Uniprot/SWISSPROT;Acc:P62841]	4.97246	2.51461	0.994195	0.729682	0.871806	1	2.50125	1.66676	3.58886	4.26056	1.97006	-0.0265602	0.324307	0.680229	0.089257	0.347225	0.634857	0.468075	0.329627	0.757843	0.87178
H300002590	RL23A_HUMAN	60S ribosomal protein L23a. [Source:Uniprot/SWISSPROT;Acc:P62750]	4.92304	1.64213	0.987414	0.711834	0.563442	1	2.88964	1.60016	1.12838	2.29233	1.25949	0.252408	0.251181	0.16205	0.0919577	0.201762	0.174673	-0.378582	0.146588	0.11163	0.183656
H300004566	XP_372778.2	PREDICTED: similar to ribosomal protein S15a [Source:RefSeq_peptide;Acc:XP_372778]	4.91401	2.53421	0.994179	0.856277	0.296834	1	4.53424	2.68706	2.84368	3.3148	1.42703	0.535627	0.399381	0.800068	0.0941057	0.306578	-0.162402	-0.252074	-0.0065502	-0.240613	-0.135432
H300005555	RS3A_HUMAN	40S ribosomal protein S3a. [Source:Uniprot/SWISSPROT;Acc:P61247]	4.85836	3.20862	0.995074	0.617592	0.060339	1	5.88117	2.82589	2.80738	3.12626	2.07805	0.192981	0.0984071	0.15303	0.307891	-0.0766422	-0.873738	-1.64529	-0.700311	-0.540779	-0.750534
H300005339	NULL	similar to ribosomal protein S2; 40S ribosomal protein S2 (LOC286444), mRNA [Source:RefSeq_dna;Acc:XM_208423]	4.85626	2.13214	0.992867	0.863394	0.389733	1	2.44582	1.71207	3.00854	3.79679	1.37289	0.357565	0.396036	0.324826	0.200447	0.396556	0.069842	-0.136659	-0.0941676	-0.282185	0.040109
H300000427	RPLP1	60S acidic ribosomal protein P1. [Source:Uniprot/SWISSPROT;Acc:P05386]	4.85496	2.7036	0.994011	0.567368	0.365145	1	2.81682	1.14275	3.07425	4.57238	2.39577	0.0230404	0.0182367	0.33909	0.0284784	0.0751128	-0.216311	0.159465	-0.0257142	-0.415673	-0.0949822
H300010297	PPIA_HUMAN	Peptidyl-prolyl cis-trans isomerase A (EC 5.2.1.8) (PPIase) (Rotamase) (Cyclophilin A) (Cyclosporin A-binding protein). [Source:Uniprot/SWISSPROT;Acc:P62937]	4.85494	2.27863	0.992979	0.662962	0.115161	1	2.55947	1.12919	3.35884	3.55215	1.92192	0.18757	-0.057767	0.717406	0.196375	0.0848557	-0.526531	-0.825616	-0.85864	-0.214601	-0.485119
opHsV0400000984	COX8A	Cytochrome c oxidase polypeptide VIII-liver/heart, mitochondrial precursor (EC 1.9.3.1) (Cytochrome c oxidase subunit 8-2). [Source:Uniprot/SWISSPROT;Acc:P10176]	4.80786	1.62528	0.98404	0.131777	0.928786	1	0.738776	0.831728	2.13251	2.31008	1.05701	-0.319804	-0.201918	-0.0399892	-0.240998	-0.253588	0.688508	0.871438	0.88193	0.743359	0.937431
H300008312	RL41_HUMAN	60S ribosomal protein L41 (HG12). [Source:Uniprot/SWISSPROT;Acc:P62945]	4.7357	4.62504	0.998737	0.939005	0.509356	1	8.95416	5.34281	5.03322	6.86008	4.31432	2.66333	0.79588	2.76775	0.194052	0.958396	0.102983	-0.199217	-0.101875	0.12659	0.19614
H300009473	EEF1G	Elongation factor 1-gamma (EF-1-gamma) (eEF-1B gamma) (PRO1608). [Source:Uniprot/SWISSPROT;Acc:P26641]	4.71634	2.71126	0.992148	0.105501	0.134895	1	1.56467	1.25772	4.13242	3.54077	1.86069	-0.36309	-0.296282	-0.173264	-0.252963	-0.114408	-0.229958	-0.547639	-0.618474	-0.367898	-0.570945
opHsV0400003391	NULL	21 kDa protein [Source:IPI;Acc:IPI00472864]	4.67456	1.19176	0.974252	0.199408	0.776091	1	1.09947	0.464322	1.09389	1.91598	0.655114	0.0140143	-0.128735	-0.208891	-0.131128	-0.275267	0.209725	0.293705	0.440121	0.37098	0.372739
opHsV0400002596	XP_039218.7	PREDICTED: similar to ribosomal protein S2; 40S ribosomal protein S2 [Source:RefSeq_peptide;Acc:XP_039218]	4.66408	1.89874	0.988933	0.353318	0.513897	1	1.85085	0.756632	2.43276	2.97664	1.24217	-0.319749	-0.134789	0.0966593	-0.0233546	0.146566	0.0552742	0.602656	-0.00392477	-0.292031	0.00391524
H300007073	RL11_HUMAN	60S ribosomal protein L11 (CLL-associated antigen KW-12). [Source:Uniprot/SWISSPROT;Acc:P62913]	4.62991	1.46971	0.987414	0.66269	0.0634096	1	1.74947	0.76716	2.20839	2.3631	1.02959	0.120198	0.255355	0.131805	0.206232	0.0555709	-0.680609	-0.8298	-1.01482	-0.843651	-0.599077
H300003474	RL7A_HUMAN	60S ribosomal protein L7a (Surfeit locus protein 3) (PLA-X polypeptide). [Source:Uniprot/SWISSPROT;Acc:P62424]	4.61049	1.53983	0.987894	0.688805	0.48767	1	2.40217	1.26369	2.15317	2.18924	0.71237	0.227758	0.328451	0.417326	0.0972157	-0.0492661	0.134243	-0.092495	-0.0652834	0.128994	-0.0369652
H300004059	XP_208281.1	PREDICTED: similar to ribosomal protein L18a; 60S ribosomal protein L18a [Source:RefSeq_peptide;Acc:XP_208281]	4.60824	1.30243	0.982281	0.329698	0.886662	1	0.948362	0.784623	1.65435	2.0963	0.701112	0.0567124	-0.201745	-0.00632401	0.101552	-0.277591	0.428034	0.940471	0.738589	0.538044	0.665442
H300006101	RPL18A	60S ribosomal protein L18a. [Source:Uniprot/SWISSPROT;Acc:Q02543]	4.59765	1.86953	0.990293	0.604638	0.741516	1	2.02363	1.27632	2.32537	3.31938	1.12583	-0.00641012	-0.13236	0.296022	0.204683	0.360945	0.215922	0.113435	0.333256	0.289148	0.467323
opHsV0400008974	RAN_HUMAN	GTP-binding nuclear protein Ran (GTPase Ran) (Ras-like protein TC4) (Androgen receptor-associated protein 24). [Source:Uniprot/SWISSPROT;Acc:P62826]	4.57578	1.07265	0.959387	0.140285	0.326451	1	0.569455	0.353027	1.58303	1.12586	0.595574	-0.234763	-0.115148	-0.104605	-0.4855	-0.196312	-0.140206	-0.0769882	-0.451002	0.0765888	-0.172366
opHsV0400004778	XP_496411.1	PREDICTED: similar to Hist1h2bc protein [Source:RefSeq_peptide;Acc:XP_496411]	4.47722	3.8836	0.996338	0.266728	0.901599	1	4.34508	1.29192	5.45155	5.52291	2.18476	0.056713	0.108087	-0.17058	-0.247092	-0.36891	0.738962	0.936473	0.345941	0.865438	0.789877
H200009667	RL37A_HUMAN	60S ribosomal protein L37a. [Source:Uniprot/SWISSPROT;Acc:P61513]	4.474	1.84069	0.993035	0.913873	0.648929	1	3.1944	1.57377	2.65037	3.20173	1.57227	0.755828	0.175725	1.23736	0.356284	0.463915	0.0260946	0.332158	0.314067	0.0601203	0.12431
opHsV0400013391	NULL	Human 28S ribosomal RNA	4.4676	5.88126	0.998593	0.568895	0.00446186	1	9.52497	3.05055	5.98833	8.3005	3.17602	0.154227	-0.232537	0.145632	0.0728678	0.493869	-1.86572	-2.61252	-3.32164	-1.74115	-2.99184
H300009600	RS30_HUMAN	Ubiquitin-like protein FUBI. [Source:Uniprot/SWISSPROT;Acc:P35544]	4.46231	1.9646	0.989205	0.354342	0.179434	1	1.89802	0.691618	2.68	3.09232	1.30313	-0.177383	0.0264938	0.0692959	-0.0189322	-0.0573879	-0.439335	-0.497613	-0.352081	-0.154059	-0.281728
H300005457	XP_372900.2	PREDICTED: similar to D-dopachrome tautomerase (Phenylpyruvate tautomerase II) [Source:RefSeq_peptide;Acc:XP_372900]	4.45831	1.22107	0.980617	0.449448	0.965265	1	1.06837	0.893598	2.06099	1.60362	0.528538	0.0917759	-0.0355056	0.122467	-0.120607	-0.00835932	1.02392	1.25041	1.10192	0.946241	1.04819
H300014641	RPS9	40S ribosomal protein S9. [Source:Uniprot/SWISSPROT;Acc:P46781]	4.45811	3.06681	0.994387	0.32474	0.471294	1	3.99961	0.942821	4.11745	4.21658	1.79935	-0.105909	-0.213822	0.13228	-0.0178016	-0.0529721	-0.105126	-0.209867	0.339621	-0.0191991	0.0651441
opHsV0400002600	RL41_HUMAN	60S ribosomal protein L41 (HG12). [Source:Uniprot/SWISSPROT;Acc:P62945]	4.43356	2.97599	0.995378	0.728482	0.449704	1	5.64939	2.44529	2.92465	3.72247	2.00327	0.43136	0.0261636	1.10923	0.0928272	0.205554	-0.10673	-0.277924	0.16358	0.0453225	0.0234696
H300006647	C9ORF105	-	4.42791	3.00479	0.994994	0.599952	0.908076	1	5.46806	2.00376	3.55373	3.19171	1.79595	0.820987	0.122588	0.172628	-0.00321703	-0.123737	0.662603	0.486812	1.05783	0.590584	0.999091
H300004444	NULL	-	4.41608	1.57501	0.986822	0.456213	0.255333	1	0.909684	1.12132	2.68181	2.16955	1.24076	-0.138114	-0.134952	0.383593	0.203075	-0.0655232	-0.192644	-0.261389	-0.285644	-0.129708	-0.122769
opHsV0400008951	NULL	-	4.37091	1.00241	0.970606	0.29581	0.117336	1	0.522658	0.74923	1.1654	1.66698	0.478717	-0.0383593	-0.126727	-0.0768327	-0.248284	0.0611243	-0.407654	-0.754106	-0.453253	-0.386843	-0.575926
H300001114	RS7_HUMAN	40S ribosomal protein S7. [Source:Uniprot/SWISSPROT;Acc:P62081]	4.36372	1.46218	0.978123	0.286774	0.196738	1	2.51789	1.27604	1.3642	1.23254	0.459239	0.0216614	-0.290479	0.0378978	-0.129012	-0.101066	-0.244793	-0.275183	-0.284782	-0.447471	-0.21075
opHsV0400000846	NDUFA11	NADH-ubiquinone oxidoreductase subunit B14.7 (EC 1.6.5.3) (EC 1.6.99.3) (Complex I-B14.7) (CI-B14.7). [Source:Uniprot/SWISSPROT;Acc:Q86Y39]	4.36356	1.14985	0.981913	0.574316	0.939869	1	1.15867	0.706591	1.79516	1.86801	0.624906	0.129974	-0.0339528	0.103396	0.109368	0.0953081	0.804888	0.882984	0.812829	0.83414	1.12719
H300005311	NULL	30 kDa protein [Source:IPI;Acc:IPI00479315]	4.295	1.27245	0.986662	0.80499	0.565457	1	2.35114	0.969602	1.70276	1.96324	0.827846	0.344423	0.256213	0.430982	0.0979042	0.32284	0.153082	-0.0243331	0.0147611	0.213386	0.0231851
H300020619	RL30_HUMAN	60S ribosomal protein L30. [Source:Uniprot/SWISSPROT;Acc:P62888]	4.29322	1.77867	0.988821	0.538941	0.0973133	1	3.38334	1.13167	2.03648	1.32988	1.4368	0.14695	0.102693	0.272398	-0.136989	0.0397858	-0.558624	-0.953805	-0.513664	-0.524181	-0.470707
H300007548	HINT1	Histidine triad nucleotide-binding protein 1 (Adenosine 5'- monophosphoramidase) (Protein kinase C inhibitor 1) (Protein kinase C- interacting protein 1) (PKCI-1). [Source:Uniprot/SWISSPROT;Acc:P49773]	4.28574	1.52843	0.985623	0.505565	0.577963	1	2.5347	1.05645	1.19772	2.32369	0.826767	0.264832	-0.0434455	0.124825	-0.126395	0.0773728	-0.0210122	-0.127222	0.214872	0.166737	0.265661
H300000318	HIST1H2BK	Histone H2B K (HIRA-interacting protein 1). [Source:Uniprot/SWISSPROT;Acc:O60814]	4.27666	3.0116	0.994802	0.547593	0.930018	1	3.67534	1.19388	4.57148	4.2244	1.62227	0.188877	-0.0336549	0.174753	0.328746	-0.429336	0.948991	0.940407	0.365587	1.20181	1.28099
opHsV0400002683	NULL	17 kDa protein [Source:IPI;Acc:IPI00414925]	4.27333	2.28117	0.991428	0.484296	0.872173	1	1.83641	1.07107	2.5723	4.22035	1.9437	-0.063707	-0.113543	0.0476779	0.100505	0.267046	0.69002	1.65397	0.47232	0.429994	0.379718
opHsV0400006096	PSMB3	Proteasome subunit beta type 3 (EC 3.4.25.1) (Proteasome theta chain) (Proteasome chain 13) (Proteasome component C10-II). [Source:Uniprot/SWISSPROT;Acc:P49720]	4.24686	3.00815	0.993579	0.143571	0.872661	1	2.12018	1.3002	5.06885	3.83195	1.75272	-0.179816	-0.163411	-0.223507	-0.121005	-0.279109	0.535061	0.753137	0.367346	0.838919	0.557276
opHsV0400003520	HIST1H2AD	Histone H2A.g (H2A/g) (H2A.3). [Source:Uniprot/SWISSPROT;Acc:P20671]	4.22751	2.59916	0.992324	0.249016	0.902911	1	3.10737	0.777863	3.36437	3.88121	1.26564	-0.207181	-0.117052	0.0396978	-0.238507	-0.0763064	0.713285	1.01087	0.334543	1.01486	0.724123
H200016319	RPS3	40S ribosomal protein S3. [Source:Uniprot/SWISSPROT;Acc:P23396]	4.22411	1.58579	0.987718	0.548105	0.0914761	1	1.51216	0.827692	2.15886	2.85666	1.01246	0.0552284	0.104817	0.133391	0.0948837	0.0505579	-0.54549	-0.733035	-0.60284	-0.548097	-0.596388
H300008037	RS16_HUMAN	40S ribosomal protein S16. [Source:Uniprot/SWISSPROT;Acc:P62249]	4.22049	1.32962	0.985447	0.552423	0.761331	1	1.15246	0.836862	2.04116	2.2639	0.863798	-0.182835	0.1026	0.39436	0.0929733	0.102953	0.256133	0.400316	0.167507	0.342676	0.396335
H300004875	RPS5	40S ribosomal protein S5. [Source:Uniprot/SWISSPROT;Acc:P46782]	4.21873	2.13482	0.9917	0.639213	0.657588	1	2.57152	1.36122	3.20407	3.4061	0.895053	0.214237	0.178349	0.344084	0.204266	-0.177069	0.0151893	0.0774274	0.117521	0.28348	0.391863
opHsV0400002732	XP_495867.1	PREDICTED: similar to 60S ribosomal protein L23a [Source:RefSeq_peptide;Acc:XP_377521]	4.20228	1.12091	0.972989	0.371997	0.655813	1	1.98943	0.705962	0.525305	1.3276	0.928187	-0.242104	0.0274992	0.0939341	-0.0141147	0.00670043	0.286866	-0.16458	0.311431	0.236036	0.298814
H300001683	ATP6V1F	Vacuolar ATP synthase subunit F (EC 3.6.3.14) (V-ATPase F subunit) (Vacuolar proton pump F subunit) (V-ATPase 14 kDa subunit). [Source:Uniprot/SWISSPROT;Acc:Q16864]	4.18841	1.06869	0.964385	0.337822	0.910955	1	1.14381	0.393571	1.60855	1.41404	0.445702	-0.0267046	-0.2823	-0.0706168	-0.00358595	0.0454081	0.565983	0.915185	0.77593	0.577315	0.928143
H300004414	HIST2H2AC	Histone H2A.q (H2A/q) (H2A-GL101). [Source:Uniprot/SWISSPROT;Acc:Q16777]	4.18631	2.28739	0.992372	0.640357	0.974828	1	2.86828	0.899752	3.7695	3.21228	1.47063	-0.00239974	0.331844	0.145567	0.320859	-0.0123797	1.19907	1.47159	0.925504	1.08876	1.31281
H300005062	NULL	-	4.15086	2.04376	0.990069	0.391252	0.257045	1	1.22482	1.14037	2.86757	3.54097	1.47573	-0.0716493	-0.0546	0.25776	0.0902399	-0.191079	-0.241943	-0.0961226	-0.112967	-0.342041	-0.218586
H200000792	COX7C	Cytochrome c oxidase polypeptide VIIc, mitochondrial precursor (EC 1.9.3.1). [Source:Uniprot/SWISSPROT;Acc:P15954]	4.14242	1.96111	0.990756	0.609276	0.662082	1	3.67415	1.36008	2.53856	1.78597	1.15636	0.1817	-0.198744	0.533967	0.108517	0.0841161	0.0796562	0.278366	0.338085	0.0114419	0.212235
H200008397	DDT	D-dopachrome tautomerase (EC 5.3.3.-) (Phenylpyruvate tautomerase II). [Source:Uniprot/SWISSPROT;Acc:P30046]	4.12711	1.30297	0.982049	0.337894	0.965752	1	0.848696	0.655191	2.04914	1.98158	0.714277	-0.118174	-0.0362823	-0.0966863	0.0525792	-0.0674225	0.939639	1.33636	1.12128	0.932937	1.09588
H200007976	C14ORF112	-	4.09292	1.63941	0.987286	0.483072	0.752503	1	2.82917	1.1832	2.29259	1.50503	0.696137	-0.200548	-0.0422685	0.364847	-0.12584	0.312894	0.221714	0.246973	0.684751	0.0903768	0.45463
H200008793	NM_013387.3	ubiquinol-cytochrome c reductase complex 7.2kDa protein isoform b [Source:RefSeq_peptide;Acc:NP_001003684]	4.09286	1.02081	0.977803	0.459156	0.97865	1	1.00629	0.555422	1.93177	1.09556	0.619387	-0.0833333	-0.0351041	0.123437	0.107824	-0.00843165	1.1434	1.61736	1.1677	0.972553	1.36953
H300007600	H33_HUMAN	Histone H3.3 (PP781). [Source:Uniprot/SWISSPROT;Acc:P84243]	4.06492	1.28107	0.981993	0.522965	0.0767312	1	1.76851	0.598083	1.91803	1.86638	0.584173	0.0737116	0.182827	-0.0888131	0.207539	-0.0454193	-0.481739	-1.07795	-0.990335	-0.592503	-0.586777
H300005688	COX7A2	Cytochrome c oxidase polypeptide VIIa-liver/heart, mitochondrial precursor (EC 1.9.3.1) (Cytochrome c oxidase subunit VIIa-L) (VIIaL). [Source:Uniprot/SWISSPROT;Acc:P14406]	4.05868	1.80938	0.98831	0.400992	0.895458	1	3.09496	1.00984	2.41557	1.70599	0.756095	-0.178048	-0.19991	0.304323	-0.123098	0.1323	0.690901	1.10859	0.858278	0.39358	0.566731
H300004360	H2BFS	Histone H2B.s (H2B/s). [Source:Uniprot/SWISSPROT;Acc:P57053]	4.04153	3.80967	0.996418	0.570654	0.939069	1	5.21588	1.30323	4.98088	5.99442	2.00335	0.182528	-0.195555	0.315584	0.109458	0.0373884	1.01387	1.12498	0.391712	1.29329	1.24431
opHsV0400009283	NULL	-	4.02151	2.42201	0.99146	0.282552	0.881433	1	1.37014	1.16275	3.55358	3.95699	1.47878	0.0663411	-0.0359792	-0.17054	-0.363789	-0.0838409	0.65191	0.757344	0.508002	0.569078	0.610343
opHsV0400006981	NULL	-	4.0032	6.32128	0.99928	0.77003	0.104334	1	12.0324	6.73418	6.25399	8.55282	3.95839	4.38281	0.176	1.11349	-0.0252752	0.278275	-1.08237	-0.723619	-1.13063	-0.0961462	-0.906569
opHsV0400001186	NP_254280.1	histone H2a [Source:RefSeq_peptide;Acc:NP_254280]	3.99533	1.83363	0.985383	0.376907	0.968543	1	2.52444	0.476671	2.66355	2.44372	0.9652	-0.125511	-0.128207	0.0101851	0.214214	-0.0652414	0.993713	1.34065	0.801603	1.35849	1.36002
opHsV0400013276	NULL	FBI Forensic mitochondrial DNA sequence control region 1 (Anderson HV 1)	3.98457	3.32814	0.992787	0.250024	0.177627	1	5.57823	4.6323	2.53319	1.89541	1.24839	0.317063	-0.375246	-0.272276	-0.237738	-0.184994	-0.637362	-0.697041	-0.336478	-0.225637	-0.10952
opHsV0400008228	NULL	-	3.98354	2.23164	0.990676	0.450472	0.0658084	1	4.44126	1.75885	2.04836	1.61536	1.45125	0.219667	0.253551	-0.120001	-0.0203461	-0.175987	-0.665491	-1.49992	-0.668821	-0.533724	-0.875044
H200011758	NDUFB11	NADH-ubiquinone oxidoreductase ESSS subunit, mitochondrial precursor (EC 1.6.5.3) (EC 1.6.99.3) (Complex I-ESSS) (CI-ESSS) (Neuronal protein 17.3) (p17.3) (Np17.3) (UNQ111/PRO1064). [Source:Uniprot/SWISSPROT;Acc:Q9NX14]	3.97615	1.44922	0.984615	0.529394	0.92159	1	0.664306	1.1501	2.49995	2.22764	1.05942	-0.0370759	0.34656	0.117348	-0.00337384	-0.0681267	0.510865	0.956576	0.832201	0.913645	0.819753
H300005842	BTF3	Transcription factor BTF3 (RNA polymerase B transcription factor 3). [Source:Uniprot/SWISSPROT;Acc:P20290]	3.94489	1.85755	0.988086	0.390341	0.242188	1	3.03262	0.83496	1.44248	2.88351	1.02365	0.0105565	-0.128564	-0.156026	-0.016643	0.220123	-0.168372	-0.303967	-0.221057	-0.174219	-0.195446
H300002305	RL39_HUMAN	60S ribosomal protein L39. [Source:Uniprot/SWISSPROT;Acc:P62891]	3.92955	1.70466	0.989653	0.848105	0.681609	1	3.56594	2.04526	1.82123	1.98552	0.926845	0.447717	0.0974425	0.62454	0.308183	0.3436	0.154387	0.13959	0.0334365	0.28191	0.367155
H300008526	XP_496363.1	PREDICTED: similar to ribosomal protein S2; 40S ribosomal protein S2 [Source:RefSeq_peptide;Acc:XP_496363]	3.91378	2.14821	0.990836	0.517288	0.467775	1	1.2736	1.0189	3.01708	3.91839	1.92233	-0.00465668	0.0245876	0.321112	-0.0233145	0.0915225	-0.00645914	0.233866	-0.0339881	-0.302191	0.0446781
H300010001	RL27_HUMAN	60S ribosomal protein L27. [Source:Uniprot/SWISSPROT;Acc:P61353]	3.90479	1.2041	0.984839	0.739181	0.545482	1	2.52501	1.10954	1.42497	1.42575	0.733667	0.0895851	0.177271	0.533513	0.200211	0.197846	0.158861	-0.0725975	0.0165732	0.0280817	0.165492
H300002874	HIST1H3D	Histone H3/b. [Source:Uniprot/SWISSPROT;Acc:Q93081]	3.86288	3.46825	0.995554	0.507804	0.973229	1	5.38845	1.48087	4.71944	4.80829	1.24998	0.114855	-0.294248	0.0221858	0.101884	0.361087	1.33451	1.64988	0.68846	1.3864	1.54145
H300021155	FTH1	Ferritin heavy chain (Ferritin H subunit). [Source:Uniprot/SWISSPROT;Acc:P02794]	3.85825	1.53955	0.982249	0.387574	0.0127619	1	2.78866	1.10509	0.83689	2.09965	0.776294	-0.0552627	0.0949021	-0.174593	-0.0293593	0.073155	-1.54851	-2.00765	-1.55176	-1.60341	-1.60325
opHsV0400002560	HIST1H2AK	Histone H2A.e (H2A/e). [Source:Uniprot/SWISSPROT;Acc:Q99878]	3.83305	2.8254	0.992196	0.180681	0.89242	1	3.95967	0.793806	3.77159	3.80512	0.898304	-0.0220457	-0.118712	-0.277662	-0.238159	-0.241923	0.939814	0.925069	0.346523	0.747197	0.556823
opHsV0400008992	RPLP0	60S acidic ribosomal protein P0 (L10E). [Source:Uniprot/SWISSPROT;Acc:P05388]	3.81805	1.13138	0.974796	0.235295	0.0846953	1	0.515926	0.591113	1.17772	2.08354	0.717679	-0.258535	-0.134616	-0.195315	0.0884434	-0.0708855	-0.569879	-0.789985	-0.502938	-0.623272	-0.785673
H300020244	Q9H0X8_HUMAN	Protein HSPC163. [Source:Uniprot/SWISSPROT;Acc:Q9P003]	3.80661	1.54064	0.98292	0.365265	0.969455	1	2.47261	0.535769	2.24147	1.68018	0.626257	0.161818	-0.12284	-0.0516051	-0.125078	-0.00922442	0.962586	1.0473	1.34482	1.12786	1.17448
opHsV0400002725	RS30_HUMAN	Ubiquitin-like protein FUBI. [Source:Uniprot/SWISSPROT;Acc:P35544]	3.77991	1.44095	0.981865	0.372253	0.231649	1	1.06903	0.476738	2.33252	2.24699	0.943786	-0.159866	-0.210206	0.198761	-0.130809	0.166414	-0.25431	-0.464972	-0.261924	-0.0826465	-0.196602
H200000115	ATP5G3	ATP synthase lipid-binding protein, mitochondrial precursor (EC 3.6.3.14) (ATP synthase proteolipid P3) (ATPase protein 9) (ATPase subunit C). [Source:Uniprot/SWISSPROT;Acc:P48201]	3.76946	1.70496	0.989941	0.765233	0.564881	1	1.86176	0.923632	3.14089	2.82238	1.11508	0.586568	0.0411195	0.256419	0.216176	0.238676	-0.200866	0.139523	0.0050623	0.191005	0.240165
H300005237	LSM2	U6 snRNA-associated Sm-like protein LSm2 (SnRNP core Sm-like protein Sm-x5) (G7b protein) (Small nuclear ribonuclear protein D homolog). [Source:Uniprot/SWISSPROT;Acc:Q9Y333]	3.75577	1.09914	0.961874	0.277499	0.901951	1	0.707488	0.620121	1.68028	1.75586	0.338792	-0.0190033	-0.124354	-0.116172	-0.0096779	-0.123969	0.479697	0.840268	0.82261	0.524283	0.981383
opHsV0400002686	NULL	8 kDa protein [Source:IPI;Acc:IPI00240459]	3.72797	1.95078	0.989189	0.39629	0.882696	1	1.31969	0.805819	2.87399	3.44144	1.18021	-0.0871022	0.19762	-0.0305956	-0.240386	0.0277368	0.629878	1.17288	0.844706	0.341093	0.473827
H300019045	PRDX4	Peroxiredoxin 4 (EC 1.11.1.-) (Prx-IV) (Thioredoxin peroxidase AO372) (Thioredoxin-dependent peroxide reductase A0372) (Antioxidant enzyme AOE372) (AOE37-2). [Source:Uniprot/SWISSPROT;Acc:Q13162]	3.719	1.7203	0.984104	0.19976	0.775004	1	0.665709	0.686412	3.04143	2.19045	1.23794	-0.093303	-0.113991	-0.26975	-0.118875	-0.183645	0.131645	0.189824	0.524468	0.442587	0.504719
H300005976	NULL	15 kDa protein [Source:IPI;Acc:IPI00478114]	3.70849	4.10764	0.995698	0.568703	0.944619	1	2.05276	1.6586	6.47163	7.01151	4.0985	-0.00499357	-0.207613	0.650899	0.100782	0.215712	1.50287	1.91409	1.64924	0.576671	0.511656
opHsV0400004721	HIST1H2BH	Histone H2B.j (H2B/j). [Source:Uniprot/SWISSPROT;Acc:Q93079]	3.70134	2.49565	0.99226	0.515113	0.962434	1	2.23309	0.80734	3.86518	4.32057	1.55123	0.11647	0.260704	-0.118227	0.105746	-0.0655125	1.1756	1.22561	0.734311	1.25959	1.07085
opHsV0400009230	NULL	-	3.6982	1.59677	0.973821	0.207708	0.878378	1	0.900029	0.371456	1.98669	2.7745	1.10362	0.029381	-0.279301	-0.378541	-0.125974	-0.093114	0.640556	1.4363	0.826118	0.403724	0.311765
opHsV0400000166	HIST1H2BJ	Histone H2B.r (H2B/r) (H2B.1). [Source:Uniprot/SWISSPROT;Acc:P06899]	3.69588	3.25118	0.992899	0.387542	0.997041	1	2.6277	0.616875	4.75857	5.57479	2.59412	0.110135	-0.127478	0.0657519	-0.123739	-0.00854097	1.80692	2.0643	1.71482	1.49053	1.74294
H200017552	RBX1_HUMAN	RING-box protein 1 (Rbx1) (Regulator of cullins 1) (RING finger protein 75) (ZYP protein). [Source:Uniprot/SWISSPROT;Acc:P62877]	3.68241	1.33575	0.981145	0.427355	0.867184	1	1.09689	0.736184	2.31107	2.01127	0.516312	0.0451387	0.188881	0.0744846	-0.0111844	-0.304326	0.522644	0.4103	0.599642	0.589187	0.716036
H200007830	GAPD	Glyceraldehyde-3-phosphate dehydrogenase, liver (EC 1.2.1.12) (GAPDH). [Source:Uniprot/SWISSPROT;Acc:P04406]	3.67382	1.41927	0.985311	0.901383	0.0155205	1	0.585129	1.32793	2.76007	2.39108	1.77802	0.302917	0.276109	0.373526	0.454737	0.338572	-1.47964	-1.81404	-1.67576	-1.15951	-1.68553
opHsV0400000269	HIST1H2AB	Histone H2A.m (H2A/m). [Source:Uniprot/SWISSPROT;Acc:P04908]	3.67052	2.97638	0.991972	0.249	0.972189	1	4.60367	0.618409	4.30739	3.52396	1.28195	-0.185211	-0.123821	-0.163088	0.105365	-0.179771	1.04138	1.36909	0.832953	1.41427	1.38388
opHsV0400007524	RPL13	60S ribosomal protein L13 (Breast basic conserved protein 1) (OK/SW- cl.46). [Source:Uniprot/SWISSPROT;Acc:P26373]	3.66408	1.45853	0.981113	0.319239	0.300416	1	0.558268	0.62637	2.09667	2.51933	1.17948	-0.125871	-0.214953	0.0610933	-0.135776	0.102949	-0.0983661	-0.31212	-0.224459	-0.0646554	-0.071707
H300002254	XP_294311.1	PREDICTED: similar to Histidine triad nucleotide-binding protein 1 (Adenosine 5-monophosphoramidase) (Protein kinase C inhibitor 1) (Protein kinase C-interacting protein 1) (PKCI-1) [Source:RefSeq_peptide;Acc:XP_380057]	3.66276	1.20325	0.966816	0.367456	0.784983	1	1.24348	0.603669	1.66882	2.02683	0.355752	-0.101546	-0.0373103	0.348047	-0.123259	-0.203609	0.242835	0.927437	0.389079	0.176644	0.316041
opHsV0400007760	NULL	-	3.64912	2.45934	0.989797	0.471262	0.968047	1	2.40399	0.547541	3.78463	4.10277	1.54912	0.167106	0.112237	0.00664058	0.108037	-0.30265	1.17111	1.51412	0.700794	1.43536	1.21272
opHsV0400001200	RL41_HUMAN	60S ribosomal protein L41 (HG12). [Source:Uniprot/SWISSPROT;Acc:P62945]	3.64098	3.17443	0.995474	0.777307	0.746698	1	6.96146	3.0897	2.69747	2.96112	3.50441	1.99321	0.393158	0.86036	-0.136256	0.231529	0.0478056	0.447851	0.389757	0.197567	0.521307
opHsV0400006114	H4_HUMAN	Histone H4. [Source:Uniprot/SWISSPROT;Acc:P62805]	3.6298	3.05017	0.992835	0.207173	0.964785	1	4.61133	0.783652	4.49447	3.66787	1.01969	-0.190866	-0.294096	-0.107627	-0.0125515	-0.0686936	1.42761	1.61175	0.6055	1.25081	1.17843
opHsV0400003406	TBBX_HUMAN	Tubulin beta-? chain (Tubulin beta-2 chain). [Source:Uniprot/SWISSPROT;Acc:P68371]	3.55969	2.36726	0.988725	0.186119	0.612842	1	1.2642	0.585145	4.17085	3.27247	1.70582	-0.201634	-0.119862	0.000166553	-0.126224	-0.390272	-0.0190141	0.230155	-0.203604	0.732593	0.237309
opHsV0400006009	NULL	-	3.55616	3.22889	0.993907	0.335519	0.977611	1	5.34543	0.981256	4.29518	4.24002	1.054	0.164294	-0.207348	-0.0505294	-0.0109403	-0.124049	1.24955	1.47607	0.812199	1.78629	1.50278
opHsV0400006534	HIST1H2AH	H2A histone family member [Source:RefSeq_peptide;Acc:NP_542163]	3.55568	2.27199	0.979498	0.204478	0.400272	1	3.49162	0.402307	3.08958	2.55786	0.714438	0.0663684	-0.116967	-0.23661	-0.616204	-0.200744	-0.396394	-0.0336195	-0.618559	0.554673	-0.00374335
H200001751	NP_116024.1	seven transmembrane domain protein [Source:RefSeq_peptide;Acc:NP_116024]	3.54283	1.33733	0.986918	0.854118	0.958548	1	0.906499	1.22982	2.50104	2.61608	1.01265	0.474015	0.346431	0.177123	0.219379	0.362466	0.720078	1.1665	1.15483	0.926073	1.31672
H300007962	NULL	31 kDa protein [Source:IPI;Acc:IPI00478002]	3.54264	1.98305	0.990549	0.629634	0.731233	1	1.38342	1.01544	2.92879	3.92628	1.37524	0.130911	0.0273151	0.217123	0.0902726	0.248296	0.608502	1.43104	0.4702	-0.215043	0.234894
H300008191	GBG5_HUMAN	Guanine nucleotide-binding protein G(I)/G(S)/G(O) gamma-5 subunit. [Source:Uniprot/SWISSPROT;Acc:P63218]	3.50566	3.10458	0.993955	0.567991	0.878218	1	1.61181	1.73402	3.90142	6.32808	2.38882	0.206821	0.0323943	0.226353	-0.119223	0.0948954	0.497903	1.10808	0.812349	0.324941	0.614402
opHsV0400005863	NULL	-	3.50298	1.62581	0.986247	0.401951	0.599104	1	1.08056	0.783627	2.26455	3.09569	0.898951	-0.242753	0.104054	0.334824	-0.13653	-0.0652868	0.345834	1.24055	0.186088	-0.217579	-0.107735
opHsV0400000793	SF3B5	Splicing factor 3B subunit 5 (SF3b5) (Pre-mRNA splicing factor SF3b 10 kDa subunit). [Source:Uniprot/SWISSPROT;Acc:Q9BWJ5]	3.4964	1.08979	0.97953	0.602247	0.957796	1	1.18444	0.511027	2.20374	1.48164	0.657968	-0.0153441	0.264404	0.189016	0.21725	-0.0654672	0.900491	1.05586	0.888203	1.03157	1.22998
H200019704	Q9BUX9_HUMAN	Tubulin alpha-ubiquitous chain (Alpha-tubulin ubiquitous) (Tubulin K- alpha-1). [Source:Uniprot/SWISSPROT;Acc:P68363]	3.47025	2.19659	0.991348	0.783448	0.171806	1	1.17821	1.15495	4.34745	3.43407	2.07401	0.237707	0.255335	0.244221	0.205404	0.263056	-0.447032	-0.6314	-0.829506	0.024221	-0.674646
H200008624	RPL35	60S ribosomal protein L35. [Source:Uniprot/SWISSPROT;Acc:P42766]	3.44077	1.66116	0.986742	0.71337	0.515033	1	3.19314	1.20965	2.27373	2.41987	0.54047	0.567138	0.178358	0.500335	0.0939527	-0.00871293	0.149709	-0.089379	-0.137727	0.00750927	0.335399
H200013772	HIST1H2BO	Histone H2B.n (H2B/n) (H2B.2). [Source:Uniprot/SWISSPROT;Acc:P23527]	3.41504	1.81738	0.953654	0.129554	0.827939	1	1.87201	0.365903	2.87045	2.39999	0.310846	-0.00753248	-0.210293	-0.241009	-0.246927	-0.561962	0.355513	0.816601	0.119153	0.555138	0.785422
opHsV0400000164	H4_HUMAN	Histone H4. [Source:Uniprot/SWISSPROT;Acc:P62805]	3.37379	4.28063	0.996929	0.514617	0.996034	1	7.91558	1.75525	5.89172	5.66577	1.71578	1.41827	-0.208637	0.588996	-0.247352	-0.0103562	1.77142	1.86143	1.41312	1.81412	2.25262
opHsV0400003473	H4_HUMAN	Histone H4. [Source:Uniprot/SWISSPROT;Acc:P62805]	3.36483	2.06262	0.981569	0.294227	0.99976	1	2.81727	0.475312	3.29661	2.718	0.504136	0.123987	-0.120668	-0.0250539	-0.237537	-0.242516	2.47708	2.97413	2.09884	2.86304	2.79845
H300000553	GBG5L_HUMAN	Guanine nucleotide-binding protein G(I)/G(S)/G(O) gamma-5 like subunit. [Source:Uniprot/SWISSPROT;Acc:Q9Y3K8]	3.36072	1.60724	0.98711	0.591436	0.880665	1	0.990545	0.894307	2.42381	3.25696	1.12292	0.0470449	0.0339889	0.423616	0.214061	-0.0663726	0.457019	0.83716	0.789108	0.42116	0.712523
opHsV0400003313	NP_003513.1	H2B histone family, member A [Source:RefSeq_peptide;Acc:NP_003509]	3.34903	2.46593	0.985655	0.381809	0.978506	1	3.89586	0.444212	3.4788	3.52613	0.905039	0.231777	0.108121	-0.107186	-0.127807	-0.184526	1.44303	1.56683	0.831951	1.53946	1.30926
opHsV0400007258	NULL	-	3.34061	1.79785	0.986455	0.456965	0.797505	1	0.840557	0.667498	2.64644	3.42564	1.55632	-0.140156	0.105454	0.222047	0.201594	-0.241723	0.780383	2.16678	0.784304	0.00945981	0.155266
opHsV0400006115	H4_HUMAN	Histone H4. [Source:Uniprot/SWISSPROT;Acc:P62805]	3.33366	2.40414	0.989013	0.342156	0.889021	1	4.01377	0.721334	3.62011	2.8337	0.617578	0.168165	-0.209611	0.14024	-0.128459	-0.184533	0.0315176	1.47427	0.86343	1.40542	1.65286
H200010602	H4_HUMAN	Histone H4. [Source:Uniprot/SWISSPROT;Acc:P62805]	3.30329	5.2848	0.998385	0.642644	0.997361	1	9.88628	2.50904	7.27578	7.9981	2.56288	2.91527	0.183966	0.900981	-0.0082338	-0.183906	2.06384	2.59596	1.42544	2.16245	2.3227
H200011616	CGE0_HUMAN	UPF0139 protein CGI-140 (PTD008) (My006 protein). [Source:Uniprot/SWISSPROT;Acc:Q9Y284]	3.20955	1.02183	0.972973	0.581929	0.949688	1	0.613134	0.834054	2.00322	1.707	0.432807	-0.0953344	-0.033789	0.235096	0.219878	0.155226	0.842586	1.06949	1.00608	0.846643	0.993523
opHsV0400005844	COX2_HUMAN	Cytochrome c oxidase polypeptide II (EC 1.9.3.1). [Source:Uniprot/SWISSPROT;Acc:P00403]	3.18294	1.38428	0.967264	0.625508	0.593987	1	2.63656	0.907415	0.374615	2.31982	1.56361	0.444452	-0.0696528	0.163785	-0.0326217	0.374656	0.544408	0.977667	0.131958	-0.206823	-0.149364
H300009400	XP_496890.1	PREDICTED: similar to 60S ribosomal protein L35 [Source:RefSeq_peptide;Acc:XP_499313]	3.15145	1.53498	0.988549	0.768367	0.616424	1	3.48235	0.932551	2.07398	1.83126	0.872608	0.271176	0.254343	0.653341	-0.0196547	0.358646	0.223162	-0.132166	0.0782359	0.174426	0.340713
opHsV0400000168	HIST1H3D	Histone H3/b. [Source:Uniprot/SWISSPROT;Acc:Q93081]	3.12606	1.99772	0.968799	0.32099	0.945322	1	3.31571	0.309133	3.21541	2.31841	0.589244	0.0541429	-0.0470506	-0.110128	-0.0122933	-0.125383	1.17655	1.42781	0.394875	1.25184	1.13045
opHsV0400002037	HIST1H2BL	Histone H2B.c (H2B/c). [Source:Uniprot/SWISSPROT;Acc:Q99880]	3.12474	2.98855	0.984887	0.241148	0.921686	1	5.57639	0.417422	3.81168	3.59346	0.995327	-0.0116882	-0.116089	-0.052413	-0.125901	-0.242384	0.808079	0.959042	0.37433	1.05594	1.08551
opHsV0400002317	ACTG_HUMAN	Actin, cytoplasmic 2 (Gamma-actin). [Source:Uniprot/SWISSPROT;Acc:P63261]	3.09883	1.81811	0.982344	0.141644	0.534927	1	0.564077	0.734663	3.34734	2.7154	0.732189	-0.211587	-0.195493	-0.284695	-0.119785	-0.185339	0.225267	0.300454	-0.134284	0.110188	-0.158728
H200013144	CST3	Cystatin C precursor (Neuroendocrine basic polypeptide) (Gamma-trace) (Post-gamma-globulin). [Source:Uniprot/SWISSPROT;Acc:P01034]	3.05361	1.37929	0.983576	0.623797	0.848777	1	0.664757	0.726017	2.55058	2.64286	0.920707	0.232528	0.0411921	0.0263969	0.218988	0.0893923	0.331186	0.665675	0.529865	0.547724	0.530756
H200005726	HIST1H3D	Histone H3/b. [Source:Uniprot/SWISSPROT;Acc:Q93081]	3.03853	1.61506	0.982512	0.673837	0.973213	1	2.74371	0.458021	3.03233	2.09076	0.708491	-0.00155142	-0.0440671	0.267579	0.32509	0.410974	0.938201	1.16754	0.94688	2.18288	2.173
H300018659	C20ORF24	(Rab5-interacting protein) (RIP5) (PNAS-11). [Source:Uniprot/SWISSPROT;Acc:Q9BUV8]	3.03023	1.74352	0.980633	0.194866	0.704766	1	0.779374	0.474126	3.2295	2.70558	0.726745	-0.214082	-0.0350375	-0.129998	-0.120377	-0.302765	0.115641	0.222476	0.295837	0.0857405	0.453095
H300002550	HIST1H2AB	Histone H2A.m (H2A/m). [Source:Uniprot/SWISSPROT;Acc:P04908]	3.02329	1.77797	0.971973	0.664305	0.98017	1	3.17743	0.327014	2.97686	2.52638	0.825514	0.286186	-0.0481419	0.0829357	0.211606	0.410761	1.2823	1.63495	0.872641	1.50966	1.42803
opHsV0400005827	COX1_HUMAN	Cytochrome c oxidase polypeptide I (EC 1.9.3.1). [Source:Uniprot/SWISSPROT;Acc:P00395]	2.95396	1.16012	0.963889	0.482185	0.0798177	1	2.40144	1.15684	0.356469	1.62251	0.883101	0.791182	0.234619	-0.0563565	-0.263834	-0.0858759	-0.626952	-0.55478	-1.80661	-0.311331	-1.46549
H300011960	Q9H0X8_HUMAN	Protein HSPC163. [Source:Uniprot/SWISSPROT;Acc:Q9P003]	2.89796	1.30697	0.960963	0.529754	0.977067	1	2.53082	0.446447	2.23079	1.37942	0.330746	0.221908	0.110792	0.0151297	0.10251	-0.0669531	1.08517	1.1158	1.37739	1.17782	1.35662
H300010247	NTF2_HUMAN	Nuclear transport factor 2 (NTF-2) (Placental protein 15) (PP15). [Source:Uniprot/SWISSPROT;Acc:P61970]	2.89284	1.26598	0.962786	0.427811	0.913609	1	0.559476	0.312113	2.24848	2.38394	0.834884	0.0413266	0.0370443	0.00586738	-0.122614	0.0473479	0.755598	0.862586	0.701909	0.630448	0.78427
H200013710	NULL	-	2.82206	2.37305	0.989445	0.442028	0.0175756	1	3.0358	0.952808	1.3017	5.39837	1.25795	-0.0240232	0.120382	-0.165603	-0.137613	0.288244	-1.04157	-1.61711	-1.72309	-1.40893	-1.98012
H200013225	HIST1H1D	Histone H1.3 (Histone H1c). [Source:Uniprot/SWISSPROT;Acc:P16402]	2.76066	1.10233	0.963082	0.722701	0.972413	1	1.66333	0.340112	2.47898	1.51642	0.472699	0.176746	0.259406	0.209002	0.215787	0.0989606	1.15792	1.28623	0.792467	1.51935	1.52668
H300007401	RS20_HUMAN	40S ribosomal protein S20. [Source:Uniprot/SWISSPROT;Acc:P60866]	2.75704	1.09844	0.97574	0.588581	0.0848233	1	2.75488	1.10744	0.771949	0.905547	0.563437	-0.0246363	0.175823	0.276341	-0.0208355	0.20438	-0.497	-0.907782	-0.564391	-0.733734	-0.605002
opHsV0400002935	LAMR1P15	Laminin receptor-like protein LAMRL5. [Source:Uniprot/SPTREMBL;Acc:Q96RS2]	2.71124	1.34801	0.955541	0.331801	0.900992	1	0.273979	0.42131	2.04358	2.78533	0.839114	0.0549553	-0.0463453	0.15779	-0.238241	-0.304875	1.11895	1.94914	1.33027	0.311038	0.330867
H200003390	ATP6V0E	Vacuolar ATP synthase subunit H (EC 3.6.3.14) (V-ATPase H subunit) (Vacuolar proton pump H subunit) (V-ATPase M9.2 subunit) (V-ATPase 9.2 kDa membrane accessory protein). [Source:Uniprot/SWISSPROT;Acc:O15342]	2.69804	1.02691	0.978346	0.740093	0.905118	1	0.740928	0.540509	2.18195	2.13242	0.581139	0.100341	0.266558	0.252022	0.32204	0.101428	0.614319	0.843591	0.935696	0.480434	0.798771
H300005165	RPS27	40S ribosomal protein S27 (Metallopan-stimulin 1) (MPS-1). [Source:Uniprot/SWISSPROT;Acc:P42677]	2.61954	1.05598	0.985271	0.818615	0.0915081	1	2.88035	1.22513	1.39246	1.37552	0.733612	0.686641	0.247906	1.06959	0.0872846	0.235758	-0.70127	-1.03439	-0.401254	-0.630921	-0.48546
H200014250	C20ORF24	(Rab5-interacting protein) (RIP5) (PNAS-11). [Source:Uniprot/SWISSPROT;Acc:Q9BUV8]	2.4711	1.45391	0.981881	0.657237	0.804862	1	0.876941	0.748879	3.24492	2.8441	0.507217	0.0397507	0.486108	0.185426	-0.122756	0.363982	0.286822	0.501066	0.505058	0.213307	0.587955
H300001107	H4_HUMAN	Histone H4. [Source:Uniprot/SWISSPROT;Acc:P62805]	2.36527	2.39444	0.983592	0.748121	0.997857	1	5.47298	0.468873	4.33199	2.7173	0.543577	0.913503	0.341507	0.0376454	0.220979	0.0488732	2.27371	2.6472	1.49026	2.2626	2.24528
H200006317	LSM4	U6 snRNA-associated Sm-like protein LSm4 (Glycine-rich protein) (GRP). [Source:Uniprot/SWISSPROT;Acc:Q9Y4Z0]	2.23875	1.06597	0.973565	0.78711	0.872429	1	0.726671	0.552537	2.29468	2.64652	0.437028	0.398345	0.270254	0.0982637	0.109344	0.451398	0.587446	0.723415	0.624943	0.386724	0.678592
H300002444	XP_294387.2	PREDICTED: similar to hypothetical protein 8230402K04 [Source:RefSeq_peptide;Acc:XP_294387]	2.14738	1.58432	0.959364	0.460971	0.0769071	1	0.530031	0.303115	1.98037	4.33752	0.958443	-0.0174828	0.108138	0.0701115	-0.0165434	0.0436801	-0.486138	-0.411243	-0.854648	-0.90128	-1.49154
H300001292	XP_496190.1	PREDICTED: similar to 60S ribosomal protein L17 (L23) (Amino acid starvation-induced protein) (ASI) [Source:RefSeq_peptide;Acc:XP_496190]	1.69872	1.03281	0.960787	0.610299	0.0860067	1	3.5823	0.656377	0.516701	0.597067	0.447865	0.115484	0.180406	0.245131	0.0953745	-0.000150196	-0.651009	-1.04901	-0.604406	-0.568208	-0.462026
H300008089	ZNF354B	zinc finger protein 354B [Source:RefSeq_peptide;Acc:NP_478137]	1.67727	2.30527	0.995666	0.921526	0.0299696	1	8.602	2.63351	5.11165	2.33064	2.00242	2.87865	1.25091	3.36003	0.108605	1.55568	-1.58054	-1.4666	-0.808921	-0.970752	-1.36313
opHsV0400009463	NULL	-	1.52103	1.34073	0.984775	0.743115	0.171806	1	5.20838	1.11353	1.23502	1.401	0.688062	1.21124	0.326412	1.39153	-0.136818	0.149987	-0.118121	-0.61267	-0.31354	-0.509156	-0.370625
H300005578	RL23_HUMAN	60S ribosomal protein L23 (Ribosomal protein L17). [Source:Uniprot/SWISSPROT;Acc:P62829]	1.39934	1.30222	0.975596	0.864561	0.209915	1	5.42653	1.02705	1.42943	1.68597	0.40258	1.63129	0.179968	1.07699	0.41738	0.154807	-0.133558	-0.557848	-0.280727	-0.538558	-0.0930747

## Sheet: Description
Name	probe ID from array annotation
Gene Symbol	Gene Symbol from array annotation
Description	Gene Description from array annotation
T-score DRBP76vsMock	T-score comparing 5 biological replicates each of DRBP76 IP vs Mock IP
Log FC (DRBP76vsMock)	Log Fold Change comparing 5 biological replicates each of DRBP76 IP vs Mock IP
Average PR DRBP76	Average Perentile Rank in 5 biological replicates of DRBP76 IP
Average PR Mock	Average Perentile Rank in 5 biological replicates of Mock IP
Avg PR Totals	Average Perentile Rank in 5 biological replicates of Total mRNA
Target	Target = "1" Not Target = "0"
DRBP76_1	Normalized Log Ratio of Sample/Reference
DRBP76_2	Normalized Log Ratio of Sample/Reference
DRBP76_3	Normalized Log Ratio of Sample/Reference
DRBP76_4	Normalized Log Ratio of Sample/Reference
DRBP76_5	Normalized Log Ratio of Sample/Reference
Mock_1	Normalized Log Ratio of Sample/Reference
Mock_2	Normalized Log Ratio of Sample/Reference
Mock_3	Normalized Log Ratio of Sample/Reference
Mock_4	Normalized Log Ratio of Sample/Reference
Mock_5	Normalized Log Ratio of Sample/Reference
Total_1	Normalized Log Ratio of Sample/Reference
Total_2	Normalized Log Ratio of Sample/Reference
Total_3	Normalized Log Ratio of Sample/Reference
Total_4	Normalized Log Ratio of Sample/Reference
Total_5	Normalized Log Ratio of Sample/Reference
